# Supplementary material for: Profound and selective lymphopaenia in primary lymphatic anomaly patients demonstrates the significance of lymphatic-lymphocyte interactions
Source: PubMed Central journal article supplement (PMC10656747; doi:10.3389/fimmu.2023.1279077), 2023-11-03
Supplement: DataSheet_1.pdf [file DataSheet_1.pdf]

## Supplementary Material

### **Profound and selective lymphopaenia in Primary Lymphatic Anomaly patients demonstrates the significance of lymphatic-lymphocyte interactions**

Julian Pearce, Linda Hadcocks, Sahar Mansour, Malou van Zanten, Steve Jeffery, Kristiana Gordon, Pia Ostergaard, Peter Mortimer, Derek C. Macallan \*

\* **Correspondence:** Derek C. Macallan: macallan @sgul.ac.uk

#### *Contents*

Table S1. Demographics and clinical classification of prospective cohort

Table S2. Scoring method for likelihood of intestinal lymphangiectasia

Table S3. Flow cytometry panels

Table S4. Multiple logistic regression for predictors of CD4 cytopaenia

Table S5. Protein levels in retrospective cohort by diagnostic category

Figure S1. Clinical Classification algorithm

Figure S2. Gating Strategy

Figure S3. Increased proportion of double-negative CD3<sup>+</sup> T cells in PLA patients

Figure S4. Skin-homing receptor expression on T cell subsets in controls and PLA subjects

Figure S5. Albumin and immunoglobulin levels in PLA subjects

**Table S1. Demographics and clinical classification of the Prospective Cohort**

|          | Ref ID | Cohort                                                       | Sex | Age |
|----------|--------|--------------------------------------------------------------|-----|-----|
| Control  | ILO55  | control                                                      | F   | 23  |
|          | ILO86  | control                                                      | F   | 25  |
|          | ILO58  | control                                                      | F   | 33  |
|          | DW20   | control                                                      | F   | 41  |
|          | ILO50  | control                                                      | F   | 48  |
|          | ILO54  | control                                                      | F   | 53  |
|          | IA192  | control                                                      | F   | 53  |
|          | DW25   | control                                                      | F   | 56  |
|          | ILO57  | control                                                      | F   | 57  |
|          | IA188  | control                                                      | F   | 57  |
|          | IA116  | control                                                      | F   | 68  |
|          | IA115  | control                                                      | F   | 76  |
|          | ILO56  | control                                                      | M   | 25  |
|          | IA189  | control                                                      | M   | 26  |
|          | ILO53  | control                                                      | M   | 32  |
|          | IA190  | control                                                      | M   | 34  |
|          | ILO62  | control                                                      | M   | 46  |
|          | IA191  | control                                                      | M   | 61  |
|          | ILO61  | control                                                      | M   | 67  |
|          | IA121  | control                                                      | M   | 83  |
| Simplex  | ILO87  | Milroy ( <i>FLT4/VEGFR3</i> confirmed)                       | F   | 22  |
|          | ILO80  | Milroy ( <i>FLT4/VEGFR3</i> confirmed)                       | F   | 32  |
|          | ILO89  | Milroy ( <i>FLT4/VEGFR3</i> confirmed)                       | F   | 33  |
|          | ILO78  | Milroy ( <i>FLT4/VEGFR3</i> confirmed)                       | F   | 41  |
|          | ILO88  | Milroy ( <i>FLT4/VEGFR3</i> confirmed)                       | F   | 57  |
|          | ILO68  | Milroy ( <i>FLT4/VEGFR3</i> confirmed)                       | M   | 35  |
|          | ILO84  | Lymphoedema Distichiasis Syndrome ( <i>FOXC2</i> confirmed)  | F   | 17  |
|          | ILO69  | Lymphoedema Distichiasis Syndrome ( <i>FOXC2</i> confirmed)  | F   | 29  |
|          | ILO79  | Lymphoedema Distichiasis Syndrome ( <i>FOXC2</i> confirmed)  | F   | 49  |
|          | ILO63  | Lymphoedema Distichiasis Syndrome ( <i>FOXC2</i> confirmed)  | M   | 47  |
|          | ILO77  | Lymphoedema Distichiasis Syndrome ( <i>FOXC2</i> confirmed)  | M   | 48  |
|          | ILO85  | Lymphoedema Distichiasis Syndrome ( <i>FOXC2</i> confirmed)  | M   | 58  |
|          | ILO81  | Late onset multisegmental PLA ( <i>GJC2</i> confirmed)       | F   | 24  |
|          | ILO82  | Late onset multisegmental PLA ( <i>GJC2</i> confirmed)       | M   | 53  |
|          | ILO73  | PROS ( <i>PIK3CA</i> mosaicism)                              | F   | 22  |
|          | ILO83  | Unknown                                                      | F   | 15  |
| Systemic | ILO74  | Syndromic with systemic involvement ( <i>RIT1</i> confirmed) | M   | 26  |
|          | ILO47  | GLD (incl. confirmed <i>PIEZO1</i> or <i>CCBE1</i> )         | F   | 23  |
|          | ILO67  | GLD (incl. confirmed <i>PIEZO1</i> or <i>CCBE1</i> )         | F   | 39  |
|          | ILO49  | GLD (incl. confirmed <i>PIEZO1</i> or <i>CCBE1</i> )         | F   | 39  |
|          | ILO48  | GLD (incl. confirmed <i>PIEZO1</i> or <i>CCBE1</i> )         | M   | 29  |
|          | ILO66  | GLD (incl. confirmed <i>PIEZO1</i> or <i>CCBE1</i> )         | M   | 45  |
|          | ILO46  | GLD (incl. confirmed <i>PIEZO1</i> or <i>CCBE1</i> )         | M   | 45  |
|          | ILO75  | GLD – Yellow Nail Syndrome (YNS)                             | F   | 51  |
|          | ILO76  | GLD – Yellow Nail Syndrome (YNS)                             | M   | 61  |
|          | ILO65  | WILD                                                         | F   | 24  |
|          | ILO64  | WILD                                                         | M   | 33  |
|          | ILO70  | WILD                                                         | M   | 37  |

Table S1. Subjects were sorted by diagnostic category, sex, then age. Categories follow the diagnostic algorithm in Figure S1 and correspond to those shown in Table 1. Age distributions were not significantly different between the three cohorts ( $P > 0.05$  by ANOVA).

**Table S2. Scoring method for likelihood of intestinal lymphangiectasia**

|                               |   | Number of positive variables |          |          |          |          |
|-------------------------------|---|------------------------------|----------|----------|----------|----------|
|                               |   | 0                            | 1        | 2        | 3        | 4        |
| Number of variables available | 1 | Unlikely                     | Possible |          |          |          |
|                               | 2 | Unlikely                     | Possible | Probable |          |          |
|                               | 3 | Unlikely                     | Possible | Probable | Probable |          |
|                               | 4 | Unlikely                     | Unlikely | Possible | Probable | Probable |

**Table S3. Flow cytometry panels**
**Differentiation and homing panel**

| <b>Marker</b> | <b>Colour/Format</b> | <b>Clone</b> | <b>Company</b> |
|---------------|----------------------|--------------|----------------|
| CD3           | BV510                | UCHT1        | BioLegend      |
| CD4           | PerCP-Cy5.5          | OKT4         | BioLegend      |
| CD8           | FITC                 | RPA-T8       | BioLegend      |
| CD45RA        | PE-Cy7               | HI100        | BioLegend      |
| CD28          | BV650                | CD28.2       | BioLegend      |
| CCR4 (CD194)  | PE Dazzle594         | L291H4       | BioLegend      |
| CCR7          | BV421                | GO43H7       | BioLegend      |
| CLA           | APC                  | REA1101      | Miltenyi       |
| CCR10         | PE                   | 1B5          | BD             |
| Live/Dead     | APC-Cy7              | FVD780       | ebioscience    |

**Proliferation and activation panel**

| <b>Marker</b>       | <b>Colour/Format</b> | <b>Clone</b> | <b>Company</b> |
|---------------------|----------------------|--------------|----------------|
| CD3                 | BV510                | UCHT1        | BioLegend      |
| CD4                 | PerCP-Cy5.5          | OKT4         | BioLegend      |
| CD8                 | FITC                 | RPA-T8       | BioLegend      |
| CD45RA              | PE-Cy7               | HI100        | BioLegend      |
| CD28                | BV650                | CD28.2       | BioLegend      |
| CD38                | PE Dazzle594         | HB-7         | BioLegend      |
| HLA-DR              | BV605                | L243         | BioLegend      |
| FoxP3               | BV421                | 206D         | BioLegend      |
| Ki-67               | APC                  | Ki-67        | BioLegend      |
| Annexin V Apoptosis | PE                   |              | ebioscience    |
| Live/Dead           | APC-Cy7              | FVD780       | ebioscience    |

**Table S4. Multiple logistic regression for predictors of CD4 cytopaenia**

Logit P = -2.410 + (0.0275 \* Age) + (1.120 \* F=0;M=1) + (1.491 \* Systemic) + (1.526 \* Genital) + (1.560 \* IL<sup>§</sup>=1)

Low CD4 count defined as <math>0.7 \times 10^9/L</math>.

<sup>§</sup> IL = presence of Intestinal Lymphangiectasia

N = 145 (retrospective cohort, n=177; missing data in 32 subjects)

Estimation Criterion: Maximum likelihood

Dependent Variable: CD4<LLN

Positive response (1): 1

Reference response (0): 0

Number of unique independent variable combinations: 125

**Pearson Chi-square Statistic:** 137.7 (P = 0.490)

**Likelihood Ratio Test Statistic:** 63.6 (P = <math><0.001</math>)

**-2\*Log(Likelihood) = 137.2**

**Hosmer-Lemeshow Statistic:** 8.66 (P = 0.372)

**Threshold probability for positive classification:** 0.500

**Classification Table:**

|                            | Predicted Reference | Predicted Positive | Totals |
|----------------------------|---------------------|--------------------|--------|
| Actual Reference Responses | 55                  | 15                 | 70     |
| Actual Positive Responses  | 15                  | 60                 | 75     |
| Totals                     | 70                  | 75                 | 145    |

**Details of the Logistic Regression Equation**

| Ind. Variable  | Coefficient | Standard Error | Wald Statistic | P value             | VIF   |
|----------------|-------------|----------------|----------------|---------------------|-------|
| Constant       | -2.410      | 0.540          | 19.885         | <math><0.001</math> |       |
| Age (per year) | 0.0275      | 0.0130         | 4.504          | 0.034               | 1.005 |
| Male sex       | 1.120       | 0.435          | 6.617          | 0.010               | 1.135 |
| Systemic       | 1.491       | 0.520          | 8.234          | 0.004               | 1.659 |
| Genital        | 1.526       | 0.494          | 9.545          | 0.002               | 1.124 |
| IL             | 1.560       | 0.782          | 3.978          | 0.046               | 1.578 |

| Ind. Variable  | Odds Ratio | 5% Conf. Lower | 95% Conf. Upper |
|----------------|------------|----------------|-----------------|
| Constant       | 0.0899     | 0.0312         | 0.259           |
| Age (per year) | 1.028      | 1.002          | 1.054           |
| Male gender    | 3.065      | 1.306          | 7.196           |
| Systemic       | 4.443      | 1.604          | 12.304          |
| Genital        | 4.599      | 1.747          | 12.106          |
| IL             | 4.758      | 1.027          | 22.036          |

**Table S5. Protein levels in retrospective cohort by diagnostic category**

| Group                                                                                           | n  | Plasma Protein (%LLN) |     |     |         |
|-------------------------------------------------------------------------------------------------|----|-----------------------|-----|-----|---------|
|                                                                                                 |    | IgG                   | IgA | IgM | Albumin |
| <b>Simplex</b>                                                                                  |    |                       |     |     |         |
| Milroy ( <i>FLT4/VEGFR3</i> confirmed)                                                          | 10 | 0                     | 14  | 0   | 0       |
| Congenital Milroy-like or syndromic                                                             | 16 | 0                     | 0   | 8   | 0       |
| Late onset lower limb lymphoedema only                                                          | 14 | 0                     | 8   | 0   | 0       |
| Lymphoedema distichiasis syndrome ( <i>FOXC2</i> confirmed)                                     | 13 | 0                     | 25  | 0   | 0       |
| Late onset multisegmental PLA (incl. confirmed <i>GJC2</i> )                                    | 15 | 0                     | 0   | 0   | 36      |
| Congenital and late-onset multisegmental PLA including genital oedema (excluding <i>GATA2</i> ) | 20 | 0                     | 11  | 11  | 27      |
| Uncertain classification                                                                        | 4  | 0                     | 0   | 0   | 0       |
| <b>Systemic</b>                                                                                 |    |                       |     |     |         |
| Lymphatic malformations                                                                         | 20 | 0                     | 6   | 11  | 16      |
| Congenital and late onset peripheral lymphoedema with systemic involvement                      | 5  | 0                     | 20  | 20  | 25      |
| Syndromic with systemic involvement                                                             | 5  | 20                    | 0   | 20  | 20      |
| GLD (including confirmed <i>PIEZO1</i> or <i>CCBE1</i> )                                        | 24 | 38                    | 33  | 17  | 50      |
| GLD – Yellow Nail Syndrome (YNS)                                                                | 4  | 0                     | 0   | 0   | 75      |
| Warts, Immunodeficiency, Lymphatic Dysplasia (WILD)                                             | 22 | 32                    | 32  | 14  | 53      |
| (Late onset) <i>GATA2</i> -deficiency syndrome                                                  | 5  | 25                    | 50  | 0   | 0       |

Data from the retrospective cohort of 177 subjects with primary lymphatic anomalies (PLA) from the National Primary Lymphatic Anomaly Register. Table shows subjects by diagnostic category grouped according to the Gordon et al classification (Figure S1); colours refer to the colour code in that classification (Figure S1); genotypes are given where known. GLD, Generalised Lymphatic Dysplasia. Subjects with *GATA2*-deficiency syndrome are shown for comparison. Data show number of subjects in each diagnostic category (n) and the percentage of those subjects with a protein concentration below the lower limit of normal (%LLN) for each protein, including Immunoglobulin G (IgG); Immunoglobulin A (IgA); Immunoglobulin M (IgM); and albumin.

**Figure S1. Clinical Classification algorithm**
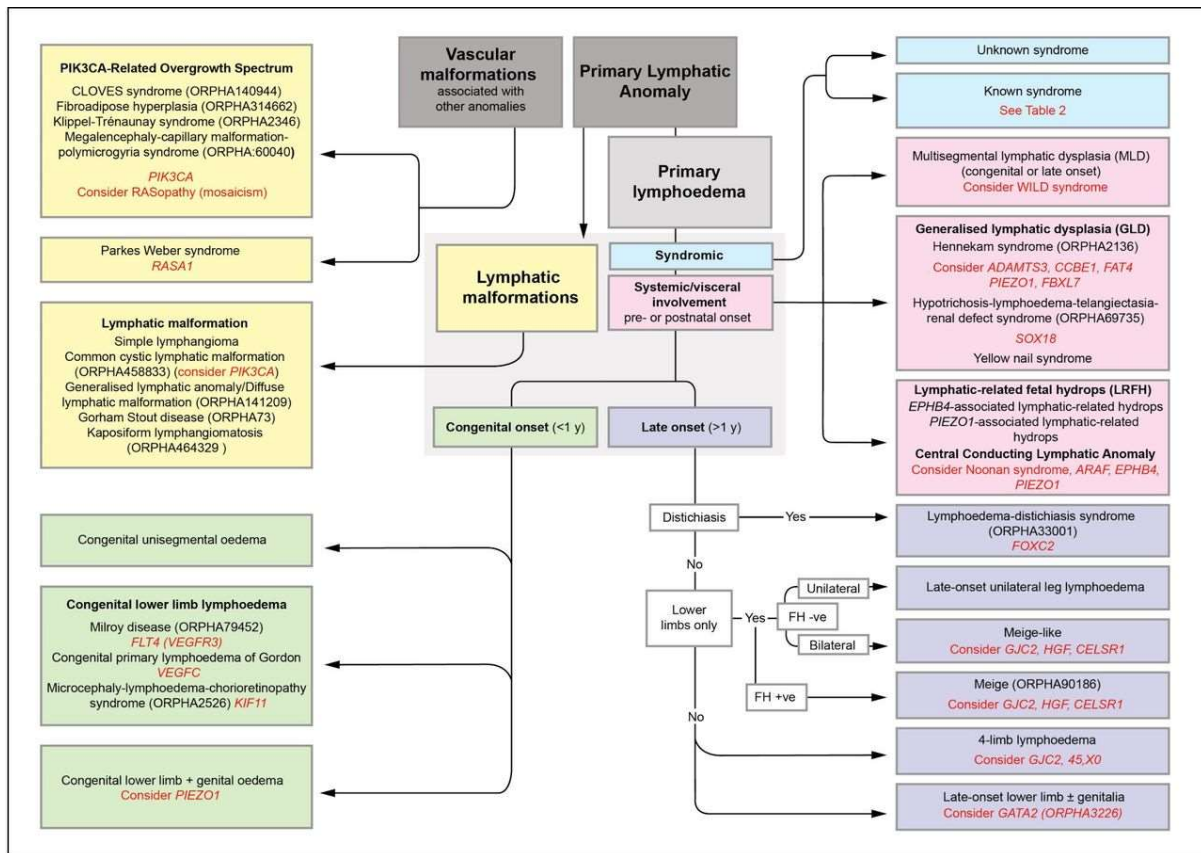

The classification algorithm for primary lymphatic anomalies (PLA) used at St George’s Hospital. Patients and subjects included in the study were classified using the five main groupings which are colour coded with their various clinical subtypes of disease. Many of the individuals further classified with ‘systemic’ disease would fall within the pink section of the algorithm. Text in red indicates the suggested genetic test or differential diagnosis for the subgroup. FH, family history; +ve, positive; –ve, negative. (Image shared by St George’s Lymphovascular Research Group under the CC BY-SA 4.0 International licence on Wikimedia Commons).



Figure S2. Gating Strategy

Illustration of gating strategy taking CD4<sup>+</sup> T cells as an example. Similar analyses were performed for CD8<sup>+</sup> T cell subsets.

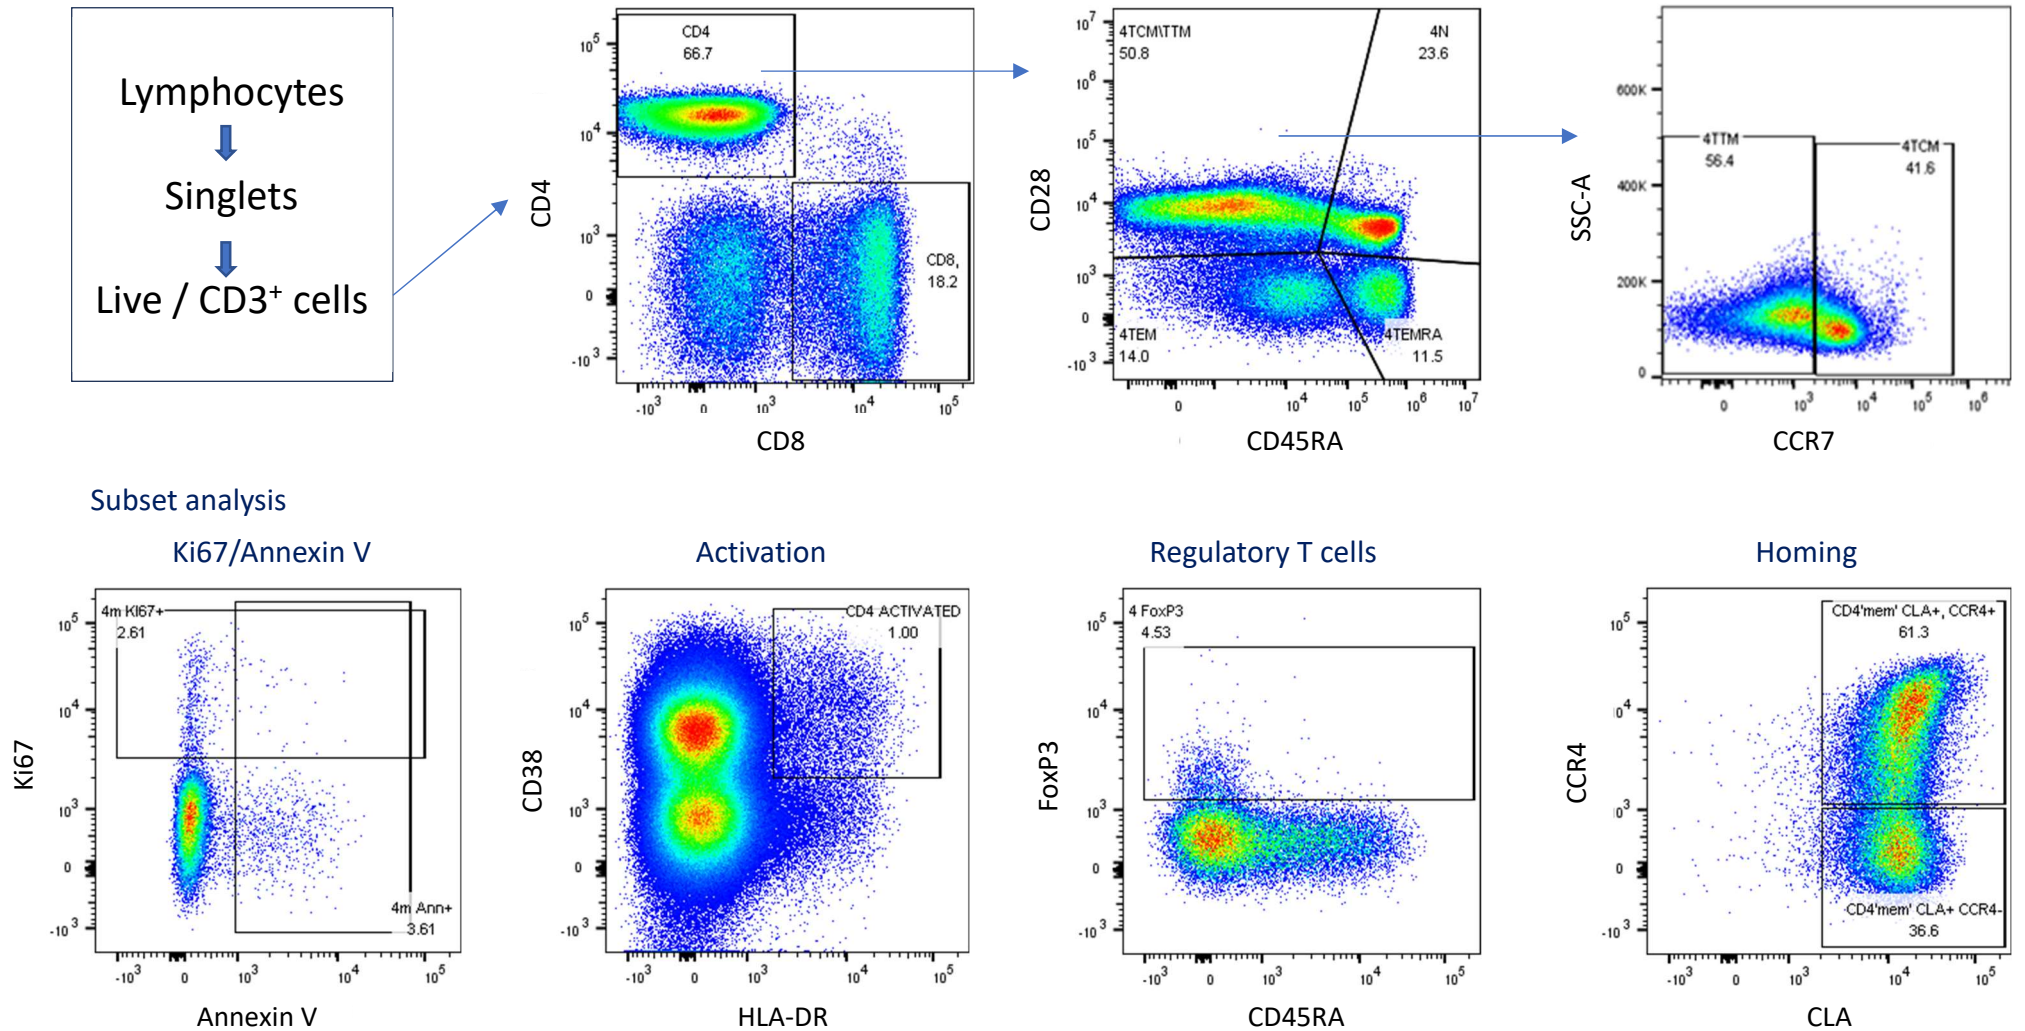

**Figure S3. Increased proportion of double-negative CD3<sup>+</sup> T cells in PLA patients**

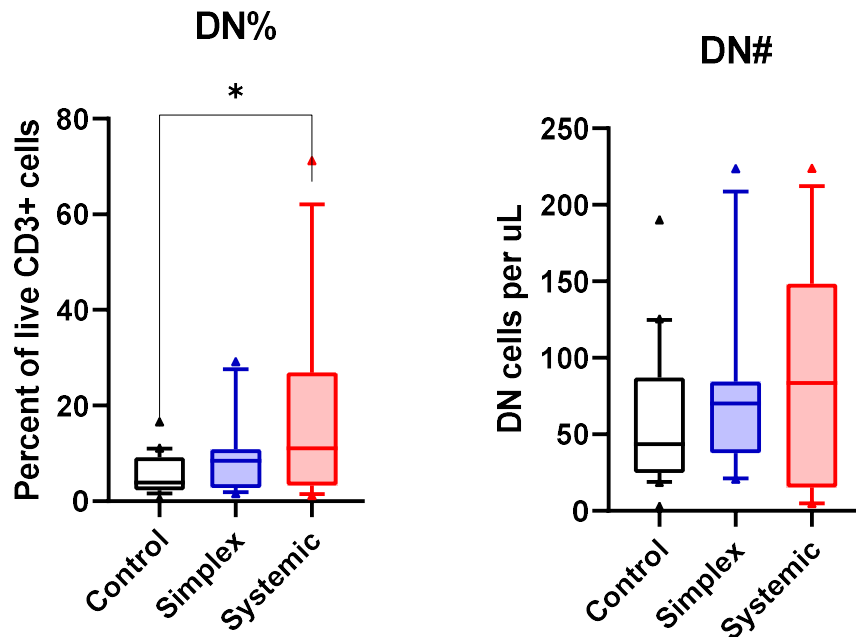

Data are shown for the proportion of circulating live CD3<sup>+</sup>CD4<sup>-</sup>CD8<sup>-</sup> 'double-negative' cells in subjects in the prospective cohort, shown either as proportion of all CD3<sup>+</sup> cells (a); or as absolute numbers (b). Box and whiskers are means with 10-90% plots for whiskers; triangles are outlier values. \* P=0.026 by ANOVA with Tukey's post-hoc test (P=0.020).

**Figure S4. Skin-homing receptor expression on T cell subsets in controls and PLA subjects**

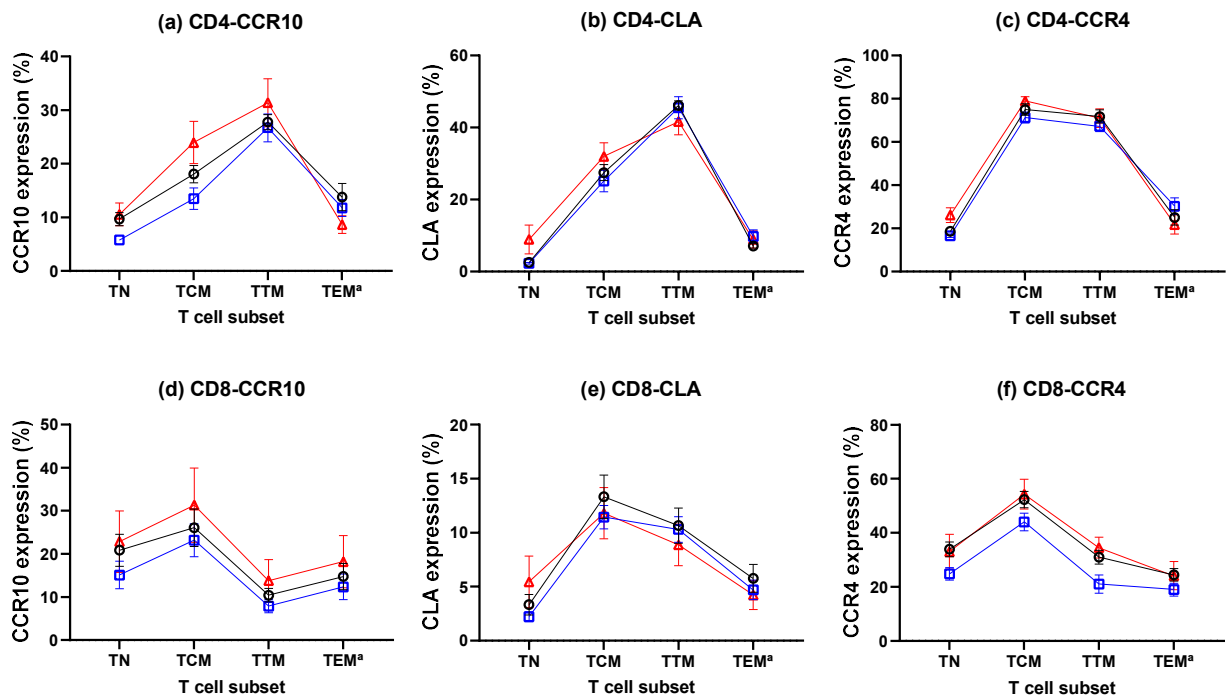

Values are mean and SD of expression rates of CCR10, left panels; CLA, middle panels; and CCR4, right panels, by prospective patient subgroup with CD4<sup>+</sup> in top panels and CD8<sup>+</sup> in lower panels. TN, naive cells; TCM, central memory cells; TTM, transitional memory cells; TEM<sup>a</sup> is effector memory cells (TEM) and re-expressing effector memory cells (TEMRA) combined as a single population. Subjects are controls (black, n=20), simplex PLA (blue, n=16), and systemic PLA (red, n=12). No differences between patient groups were found except that CD4-CCR10, CD8-CCR10 and CD8-CCR4 expression were suppressed in simplex patients (P=0.02, 0.04 and P<0.001 by two-way ANOVA).

**Figure S5. Albumin and immunoglobulin levels in PLA subjects**

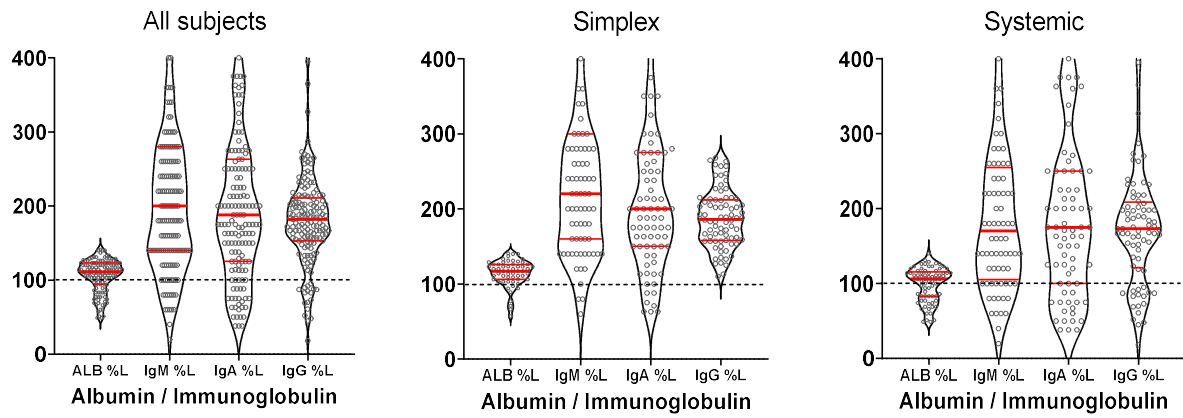

Violin plots show individual values expressed relative to the lower limit of normal (as percentage, %L); red horizontal lines represent medians and quartiles; dashed line represents the lower limit of normal. IgM, immunoglobulin M; IgA, immunoglobulin A; IgG, immunoglobulin G. Data are from the retrospective cohort; n=177 of whom 155 had data for immunoglobulin and 129 had data for albumin levels.
